# Supplementary material
Source: MDPI journal article supplement (https://www.mdpi.com/2073-4395/11/4/795)
Supplement: s1 [file agronomy-1169021-supplementary.pdf › agronomy-1169021-supplementary.pdf]

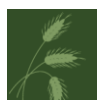

**Table S1.** Fitted coefficient (b) and constant (a) values of the regression models developed to estimate chrysanthemum leaf area (LA) of single leaves from length (L) and width (W) measurements. For each cultivar, 250 leaves were sampled (2–3 leaves/plant). Data were analyzed per cultivar. Morphological parameters of the employed leaves are provided in Table 1.

| Cultivar        |   | Model                        | Fitted coefficient and constant |       | $R^2, z$ | $MSE^z$ | $PRESS^z$ | $SSE^z$ |
|-----------------|---|------------------------------|---------------------------------|-------|----------|---------|-----------|---------|
|                 |   |                              | a                               | b     |          |         |           |         |
| Alamos yellow   | 1 | $LA = a + b \cdot L$         | -31.065                         | 5.589 | 0.702    | 29.31   | 5.41      | 7269    |
|                 | 2 | $LA = a + b \cdot W$         | -8.126                          | 6.815 | 0.666    | 32.89   | 5.74      | 8158    |
|                 | 3 | $LA = a + b \cdot L^2$       | 4.715                           | 0.215 | 0.697    | 29.87   | 5.47      | 7408    |
|                 | 4 | $LA = a + b \cdot W^2$       | 16.116                          | 0.466 | 0.645    | 35.00   | 5.92      | 8679    |
|                 | 5 | $LA = a + b \cdot L \cdot W$ | 6.682                           | 0.363 | 0.776    | 21.97   | 4.69      | 5449    |
|                 | 6 | $LA = a + b (L + W)$         | -30.346                         | 3.544 | 0.792    | 20.51   | 4.53      | 5087    |
|                 | 7 | $LA = a + b (L + W)^2$       | 4.617                           | 0.088 | 0.787    | 21.02   | 4.59      | 5213    |
|                 | 8 | $LA = a (L + W)^3$           | 16.560                          | 0.003 | 0.773    | 22.40   | 4.73      | 5555    |
| Amethyst yellow | 1 | $LA = a + b \cdot L$         | -34.321                         | 5.727 | 0.719    | 53.18   | 7.29      | 13189   |
|                 | 2 | $LA = a + b \cdot W$         | -22.801                         | 3.139 | 0.667    | 62.98   | 7.94      | 15618   |
|                 | 3 | $LA = a + b \cdot L^2$       | 1.560                           | 0.221 | 0.729    | 51.35   | 7.17      | 12735   |
|                 | 4 | $LA = a + b \cdot W^2$       | 9.651                           | 0.686 | 0.653    | 65.76   | 8.11      | 16308   |
|                 | 5 | $LA = a + b \cdot L \cdot W$ | 1.579                           | 0.432 | 0.762    | 45.06   | 6.71      | 11175   |
|                 | 6 | $LA = a + b (L + W)$         | -36.341                         | 3.881 | 0.759    | 45.85   | 6.77      | 11370   |
|                 | 7 | $LA = a + b (L + W)^2$       | 0.356                           | 0.099 | 0.773    | 43.20   | 6.57      | 10712   |
|                 | 8 | $LA = a (L + W)^3$           | 13.553                          | 0.003 | 0.766    | 44.40   | 6.66      | 11011   |
| Baltica pink    | 1 | $LA = a + b \cdot L$         | -23.051                         | 4.249 | 0.796    | 7.12    | 2.67      | 1766    |
|                 | 2 | $LA = a + b \cdot W$         | -0.793                          | 5.350 | 0.441    | 19.55   | 4.42      | 4849    |
|                 | 3 | $LA = a + b \cdot L^2$       | 2.242                           | 0.176 | 0.805    | 6.84    | 2.62      | 1696    |
|                 | 4 | $LA = a + b \cdot W^2$       | 14.539                          | 0.459 | 0.425    | 20.11   | 4.48      | 4987    |
|                 | 5 | $LA = a + b \cdot L \cdot W$ | 4.255                           | 0.359 | 0.738    | 9.14    | 3.02      | 2266    |
|                 | 6 | $LA = a + b (L + W)$         | -24.964                         | 3.024 | 0.815    | 6.44    | 2.54      | 1597    |
|                 | 7 | $LA = a + b (L + W)^2$       | 1.619                           | 0.085 | 0.817    | 6.38    | 2.53      | 1582    |
|                 | 8 | $LA = a (L + W)^3$           | 10.708                          | 0.003 | 0.810    | 6.63    | 2.57      | 1644    |
| Baltica salmon  | 1 | $LA = a + b \cdot L$         | -31.718                         | 5.011 | 0.801    | 13.05   | 3.61      | 3237    |
|                 | 2 | $LA = a + b \cdot W$         | -15.175                         | 8.066 | 0.654    | 22.62   | 4.76      | 5609    |
|                 | 3 | $LA = a + b \cdot L^2$       | -1.689                          | 0.206 | 0.823    | 11.60   | 3.41      | 2876    |
|                 | 4 | $LA = a + b \cdot W^2$       | 8.047                           | 0.687 | 0.656    | 22.49   | 4.74      | 5577    |
|                 | 5 | $LA = a + b \cdot L \cdot W$ | -0.075                          | 0.428 | 0.835    | 10.72   | 3.27      | 2658    |
|                 | 6 | $LA = a + b (L + W)$         | -33.047                         | 3.511 | 0.845    | 10.12   | 3.18      | 2509    |
|                 | 7 | $LA = a + b (L + W)^2$       | -1.940                          | 0.098 | 0.865    | 8.86    | 2.98      | 2196    |
|                 | 8 | $LA = a (L + W)^3$           | 9.060                           | 0.003 | 0.863    | 8.89    | 2.98      | 2204    |
| Baltica         | 1 | $LA = a + b \cdot L$         | -26.941                         | 4.807 | 0.812    | 9.48    | 3.08      | 2350    |

|             |   |                              |         |       |       |       |      |      |
|-------------|---|------------------------------|---------|-------|-------|-------|------|------|
|             | 2 | $LA = a + b \cdot W$         | -8.862  | 7.234 | 0.706 | 14.77 | 3.84 | 3662 |
|             | 3 | $LA = a + b \cdot L^2$       | 1.491   | 0.200 | 0.824 | 8.82  | 2.97 | 2187 |
|             | 4 | $LA = a + b \cdot W^2$       | 13.348  | 0.578 | 0.666 | 16.76 | 4.09 | 4156 |
|             | 5 | $LA = a + b \cdot L \cdot W$ | 4.657   | 0.386 | 0.843 | 7.90  | 2.81 | 1958 |
|             | 6 | $LA = a + b (L + W)$         | -26.574 | 3.254 | 0.867 | 6.70  | 2.59 | 1663 |
|             | 7 | $LA = a + b (L + W)^2$       | 2.371   | 0.090 | 0.869 | 6.55  | 2.56 | 1623 |
|             | 8 | $LA = a (L + W)^3$           | 12.513  | 0.003 | 0.856 | 7.22  | 2.69 | 1789 |
|             |   |                              |         |       |       |       |      |      |
| Botempi red | 1 | $LA = a + b \cdot L$         | -24.908 | 5.117 | 0.832 | 12.44 | 3.53 | 3084 |
|             | 2 | $LA = a + b \cdot W$         | -24.362 | 9.433 | 0.826 | 12.86 | 3.59 | 3189 |
|             | 3 | $LA = a + b \cdot L^2$       | 3.150   | 0.228 | 0.824 | 12.87 | 3.59 | 3193 |
|             | 4 | $LA = a + b \cdot W^2$       | 4.228   | 0.764 | 0.812 | 13.86 | 3.72 | 3438 |
|             | 5 | $LA = a + b \cdot L \cdot W$ | 1.329   | 0.450 | 0.884 | 8.64  | 2.94 | 2143 |
|             | 6 | $LA = a + b (L + W)$         | -28.571 | 3.531 | 0.884 | 8.65  | 2.94 | 2144 |
|             | 7 | $LA = a + b (L + W)^2$       | 1.332   | 0.102 | 0.880 | 8.92  | 2.99 | 2213 |
|             | 8 | $LA = a (L + W)^3$           | 12.074  | 0.004 | 0.852 | 10.88 | 3.30 | 2699 |

<sup>2</sup>R<sup>2</sup>, Coefficient of determination; MSE, mean square errors (cm<sup>2</sup>); PRESS, predicted residual error sum of squares; SSE, error sum of squares.

**Table S2.** Fitted coefficient (b) and constant (a) values of the regression models used to estimate chrysanthemum leaf area (LA) of single leaves from leaf length (L) and the mean aspect ratio (AR) value per cultivar. For each cultivar (Alamos yellow, Amethyst yellow, Baltica pink, Baltica salmon, Baltica, and Botempi red), 250 leaves were sampled (2–3 leaves/plant). Data were analyzed per cultivar. Morphological parameters of the employed leaves are provided in Table 1.

| Cultivar        |    | Model                           | Fitted coefficient and constant |       | $R^2, z$ | MSE <sup>z</sup> | PRESS <sup>z</sup> | SSE <sup>z</sup> |
|-----------------|----|---------------------------------|---------------------------------|-------|----------|------------------|--------------------|------------------|
|                 |    |                                 | a                               | b     |          |                  |                    |                  |
| Alamos yellow   | 9  | $LA = a + b \cdot AR \cdot L$   | 18.537                          | 1.049 | 0.125    | 86.18            | 9.28               | 21372            |
|                 | 10 | $LA = a + b \cdot AR \cdot L^2$ | 17.485                          | 0.083 | 0.360    | 63.00            | 7.94               | 15624            |
|                 | 11 | $LA = a + b \cdot AR \cdot L^3$ | 22.446                          | 0.005 | 0.461    | 53.12            | 7.29               | 13172            |
| Amethyst yellow | 9  | $LA = a + b \cdot AR \cdot L$   | 44.260                          | 0.088 | 0.003    | 189.1            | 13.75              | 46889            |
|                 | 10 | $LA = a + b \cdot AR \cdot L^2$ | 35.901                          | 0.030 | 0.092    | 172.0            | 13.12              | 42665            |
|                 | 11 | $LA = a + b \cdot AR \cdot L^3$ | 33.524                          | 0.003 | 0.198    | 152.1            | 12.33              | 37722            |
| Baltica pink    | 9  | $LA = a + b \cdot AR \cdot L$   | 8.141                           | 0.841 | 0.287    | 24.90            | 4.99               | 6175             |
|                 | 10 | $LA = a + b \cdot AR \cdot L^2$ | 10.636                          | 0.060 | 0.525    | 16.59            | 4.07               | 4115             |
|                 | 11 | $LA = a + b \cdot AR \cdot L^3$ | 14.460                          | 0.004 | 0.625    | 13.11            | 3.62               | 3251             |
| Baltica salmon  | 9  | $LA = a + b \cdot AR \cdot L$   | 11.007                          | 0.767 | 0.187    | 53.12            | 7.29               | 13174            |
|                 | 10 | $LA = a + b \cdot AR \cdot L^2$ | 10.088                          | 0.063 | 0.455    | 35.58            | 5.96               | 8823             |
|                 | 11 | $LA = a + b \cdot AR \cdot L^3$ | 13.748                          | 0.004 | 0.587    | 26.95            | 5.19               | 6685             |
| Baltica         | 9  | $LA = a + b \cdot AR \cdot L$   | 3.777                           | 1.243 | 0.353    | 32.47            | 5.70               | 8053             |
|                 | 10 | $LA = a + b \cdot AR \cdot L^2$ | 9.466                           | 0.078 | 0.576    | 21.25            | 4.61               | 5269             |
|                 | 11 | $LA = a + b \cdot AR \cdot L^3$ | 14.724                          | 0.005 | 0.663    | 16.93            | 4.11               | 4198             |
| Botempi red     | 9  | $LA = a + b \cdot AR \cdot L$   | -9.039                          | 2.501 | 0.530    | 34.61            | 5.88               | 8583             |
|                 | 10 | $LA = a + b \cdot AR \cdot L^2$ | 5.929                           | 0.139 | 0.698    | 22.25            | 4.72               | 5519             |
|                 | 11 | $LA = a + b \cdot AR \cdot L^3$ | 14.037                          | 0.008 | 0.728    | 20.07            | 4.48               | 4977             |

<sup>z</sup>R<sup>2</sup>, Coefficient of determination; MSE, mean square errors (cm<sup>2</sup>); PRESS, predicted residual error sum of squares; SSE, error sum of squares.
